# Supplementary material for: Epidemiology and natural history of Pseudomonas aeruginosa airway infections in non-cystic fibrosis bronchiectasis
Source: PubMed Central journal article supplement — ERJ Open Res. 2018 Jun 18;4(2):00162-2017. doi: 10.1183/23120541.00162-2017 (PMC6004520; doi:10.1183/23120541.00162-2017), 2018-06-18
Supplement: 00162-2017_tableS1.pdf [file 00162-2017_tableS1.pdf]

**Table S1:** Morphotype Descriptors Used in the Calgary Bronchiectasis Clinic Biobank

| MORPHOTYPE | CODE | NUMBER OF ISOLATES WITHIN BIOBANK (n) | PROPORTION OF BIOBANK (%) | ISOLATES USED IN STUDY (n) |
|------------|------|---------------------------------------|---------------------------|----------------------------|
| PINK       | 1    | 40                                    | 5.28                      |                            |
| PINK MUC   | 2    | 3                                     | 0.40                      |                            |
| SMALL PINK | 3    | 10                                    | 1.32                      |                            |
| LARGE PINK | 4    | 12                                    | 1.58                      | 5                          |
| MUCOID     | 5    | 3                                     | 0.40                      |                            |
| CLEAR MUC  | 6    | 2                                     | 0.26                      |                            |
| TINY       | 11   | 14                                    | 1.85                      |                            |
| PINK       | 50   | 161                                   | 21.24                     | 31                         |
| PINK MUC   | 51   | 54                                    | 7.12                      | 2                          |
| TINY PINK  | 53   | 0                                     | 0.00                      |                            |
| FLAT PINK  | 54   | 0                                     | 0.00                      |                            |
| SMALL PINK | 55   | 19                                    | 2.51                      | 4                          |
| SPR PINK   | 56   | 0                                     | 0.00                      |                            |
| LGE PINK   | 57   | 31                                    | 4.09                      |                            |
| DRY PINK   | 58   | 0                                     | 0.00                      |                            |
| MUCOID     | 59   | 299                                   | 39.45                     | 35                         |
| SM MUC     | 60   | 0                                     | 0.00                      | 7                          |
| LGE MUC    | 61   | 1                                     | 0.13                      |                            |
| CLEAR MUC  | 62   | 10                                    | 1.32                      | 1                          |
| TINY MUC   | 63   | 35                                    | 4.62                      |                            |
| CLEAR TINY | 64   | 0                                     | 0.00                      |                            |
| SMALL      | 65   | 1                                     | 0.13                      |                            |
| CLEAR      | 66   | 8                                     | 1.06                      | 1                          |
| ROUND MUC  | 67   | 36                                    | 4.75                      |                            |
| FUZZY      | 68   | 0                                     | 0.00                      |                            |
| SPREADING  | 69   | 2                                     | 0.26                      |                            |
| ROUGH      | 70   | 0                                     | 0.00                      |                            |
| YELLOW     | 71   | 0                                     | 0.00                      |                            |
| GREEN      | 72   | 0                                     | 0.00                      |                            |
| LIGHT      | 73   | 4                                     | 0.53                      |                            |
| DARK       | 74   | 5                                     | 0.66                      |                            |
| LARGE      | 76   | 4                                     | 0.53                      |                            |
| MEDIUM     | 80   | 2                                     | 0.26                      |                            |
| DRY        | 83   | 2                                     | 0.26                      |                            |
